# Supplementary material for: Pre- and post-partum variation in wool cortisol and wool micron in Australian Merino ewe sheep (Ovis aries)
Source: PeerJ. 2021 Apr 27;9:e11288. doi: 10.7717/peerj.11288 (PMC8086564; doi:10.7717/peerj.11288)
Supplement: Supplemental Information 1 [file peerj-09-11288-s001.xlsx]

## Sheet: Supplementary Data Wool
REF	pre-wool microns	Post-wool microns	Wool Micron Diff	pre-wool cortisol	post-wool cortisol	Wool Cortisol Diff		Sept MIC	WCM Sept			pre-wool cortisol	pre-wool microns			post-wool cortisol	Post-wool microns
04	19.4	18.3	1.1	4.6	3.1	1.5		19.4	4.6			4.6	19.4			3.1	18.3
05	19.1	18.7	0.4	3.7	3.5	0.2		19.1	3.7			3.7	19.1			3.5	18.7
06	18.8	20	-1.2	4.8	3.9	0.9		18.8	4.8			4.8	18.8			3.9	20
07	18.5	16.2	2.3	3.5	3.1	0.4		18.5	3.5			3.5	18.5			3.1	16.2				pre-wool cortisol	pre-wool microns
08	19.4	19.4	0	2.3	4.4	-2.1		19.4	2.3			2.3	19.4			4.4	19.4			pre-wool cortisol	1
10	18.7	17.4	1.3	3.9	2.6	1.3		18.7	3.9			3.9	18.7			2.6	17.4			pre-wool microns	-0.179921	1
12	19.4	17.8	1.6	5.4	1.8	3.6		19.4	5.4			5.4	19.4			1.8	17.8	0.301517
18	20.9	19.5	1.4	1.2	3.9	-2.7		20.9	1.2			1.2	20.9			3.9	19.5	0.393997
20	21.1	20.7	0.4	3.1	5.4	-2.3		21.1	3.1			3.1	21.1			5.4	20.7
21	20.7	20.5	0.2	2.9	4.8	-1.9		20.7	2.9			2.9	20.7			4.8	20.5				post-wool cortisol	Post-wool microns
22	19.8	18.8	1	4.8	4.6	0.2		19.8	4.8			4.8	19.8			4.6	18.8			post-wool cortisol	1
23	18	18.3	-0.3	4.4	1.9	2.5		18	4.4			4.4	18			1.9	18.3			Post-wool microns	0.290807	1
24	18.7	19	-0.3	4.5	2.1	2.4		18.7	4.5			4.5	18.7			2.1	19
25	17.1	15.9	1.2	2.6	3.3	-0.7		17.1	2.6			2.6	17.1			3.3	15.9
26	18.2	16.3	1.9	3.1	2.9	0.2		18.2	3.1			3.1	18.2			2.9	16.3
27	20.1	20.9	-0.8	1.9	3	-1.1		20.1	1.9			1.9	20.1			3	20.9
28	19.9	17.9	2	4.5	1.2	3.3		19.9	4.5			4.5	19.9			1.2	17.9
29	18.1	16.6	1.5	3.7	1.9	1.8		18.1	3.7			3.7	18.1			1.9	16.6
30	18.9	18.4	0.5	3.6	1.6	2		18.9	3.6			3.6	18.9			1.6	18.4
32	18.8	16.8	2	2.8	3.6	-0.8		18.8	2.8			2.8	18.8			3.6	16.8
33	17.4	16.7	0.7	2.9	2.8	0.1		17.4	2.9			2.9	17.4			2.8	16.7
34	20.3	19.9	0.4	2.9	3.2	-0.3		20.3	2.9			2.9	20.3			3.2	19.9
38	17.7	17	0.7	4.3	4.3	0		17.7	4.3			4.3	17.7			4.3	17
39	18.7	18.1	0.6	3.5	4.6	-1.1		18.7	3.5			3.5	18.7			4.6	18.1
41	17	16.4	0.6	4.5	2.3	2.2		17	4.5			4.5	17			2.3	16.4
43	21.9	20.9	1	3.3	3.1	0.2		21.9	3.3			3.3	21.9			3.1	20.9
44	19.2	18.7	0.5	3.9	3.3	0.6		19.2	3.9			3.9	19.2			3.3	18.7
46	19.6	18.1	1.5	3.9	4.8	-0.9		19.6	3.9			3.9	19.6			4.8	18.1
47	18.5	16.9	1.6	3.9	1.3	2.6		18.5	3.9			3.9	18.5			1.3	16.9
49	19.9	18.1	1.8	2.7	2.8	-0.1		19.9	2.7			2.7	19.9			2.8	18.1
50	20.5	18.4	2.1	3.5	2.7	0.8		20.5	3.5			3.5	20.5			2.7	18.4
51	19.3	18.6	0.7	1.8	4.5	-2.7		19.3	1.8			1.8	19.3			4.5	18.6
53	21.5	20.3	1.2	4.3	2.9	1.4		21.5	4.3			4.3	21.5			2.9	20.3
56	19.6	18.3	1.3	4.6	3.7	0.9		19.6	4.6			4.6	19.6			3.7	18.3
57	20.9	21.1	-0.2	3.2	2.3	0.9		20.9	3.2			3.2	20.9			2.3	21.1
58	20.4	19.8	0.6	3.8	3.5	0.3		20.4	3.8			3.8	20.4			3.5	19.8
59	18.1	18.8	-0.7	3.6	3.5	0.1		18.1	3.6			3.6	18.1			3.5	18.8
60	18.5	17.5	1	3	3.5	-0.5		18.5	3			3	18.5			3.5	17.5
	19.2789	18.4474	0.831579	3.55	3.20263	0.347368		19.2789	3.55			3.55	19.2789			3.20263	18.4474
t-Test: Two-Sample Assuming Unequal Variances				t-Test: Two-Sample Assuming Unequal Variances
				Wool cortisol between Sept and Dec
	Sept MIC	Dec MIC			Sept CORT	December CORT											t-Test: Paired Two Sample for Means
Mean	19.2789	18.4474		Mean	3.55	3.20263
Variance	1.43684	2.10851		Variance	0.841486	1.06783												pre-wool cort	pre-wool microns
Observations	38	38		Observations	38	38											Mean	3.55	19.2789
Hypothesized Mean Difference	0			Hypothesized Mean Difference	0												Variance	0.841486	1.43684
df	71			df	73												Observations	38	38
t Stat	2.72249			t Stat	1.54968												Pearson Correlation	-0.179921
P(T<=t) one-tail	0.00407327			P(T<=t) one-tail	0.0627711												Hypothesized Mean Difference	0
t Critical one-tail	1.6666			t Critical one-tail	1.666												df	37
P(T<=t) two-tail	0.00814654			P(T<=t) two-tail	0.125542												t Stat	-59.294
t Critical two-tail	1.99394			t Critical two-tail	1.993												P(T<=t) one-tail	1.3876e-38
																	t Critical one-tail	1.68709
																	P(T<=t) two-tail	2.77521e-38
																	t Critical two-tail	2.02619
Descriptive	pre-wool microns		Post-wool microns		Wool Micron Diff		pre-wool cortisol		post-wool cortisol		Wool Cortisol Diff
	Mean	19.2789	Mean	18.4474	Mean	0.831579	Mean	3.55	Mean	3.20263	Mean	0.347368
	Standard Error	0.194452	Standard Error	0.235557	Standard Error	0.137758	Standard Error	0.14881	Standard Error	0.167633	Standard Error	0.25646					t-Test: Paired Two Sample for Means
	Median	19.25	Median	18.35	Median	0.85	Median	3.6	Median	3.15	Median	0.2
	Mode	19.4	Mode	18.3	Mode	0.4	Mode	3.9	Mode	3.5	Mode	0.2						Variable 1	Variable 2
	Standard Deviation	1.19868	Standard Deviation	1.45207	Standard Deviation	0.849198	Standard Deviation	0.917326	Standard Deviation	1.03336	Standard Deviation	1.58092					Mean	3.20263	18.4474
	Sample Variance	1.43684	Sample Variance	2.10851	Sample Variance	0.721138	Sample Variance	0.841486	Sample Variance	1.06783	Sample Variance	2.49932					Variance	1.06783	2.10851
	Kurtosis	-0.429235	Kurtosis	-0.827089	Kurtosis	-0.245901	Kurtosis	0.0985784	Kurtosis	-0.48902	Kurtosis	-0.314969					Observations	38	38
	Skewness	0.170179	Skewness	0.134491	Skewness	-0.416893	Skewness	-0.411343	Skewness	0.0217452	Skewness	-0.0329181					Pearson Correlation	0.290807
	Range	4.9	Range	5.2	Range	3.5	Range	4.2	Range	4.2	Range	6.3					Hypothesized Mean Difference	0
	Minimum	17	Minimum	15.9	Minimum	-1.2	Minimum	1.2	Minimum	1.2	Minimum	-2.7					df	37
	Maximum	21.9	Maximum	21.1	Maximum	2.3	Maximum	5.4	Maximum	5.4	Maximum	3.6					t Stat	-61.9165
	Sum	732.6	Sum	701	Sum	31.6	Sum	134.9	Sum	121.7	Sum	13.2					P(T<=t) one-tail	2.84172e-39
	Count	38	Count	38	Count	38	Count	38	Count	38	Count	38					t Critical one-tail	1.68709
																	P(T<=t) two-tail	5.68344e-39
																	t Critical two-tail	2.02619

## Sheet: Climate Data
Date ((yyyymmdd))	T.Max (oC)	T.Min (oC)	Rain (mm)	Evap (mm)	Radn (MJ/m2)	VP (hPa)	RHmaxT (%)	RHminT (%)	pre-wool cortisol	pre-wool microns	post-wool cortisol	Post-wool microns
2017-04-26	15.5	9.6	0.7	1.7	6.3	12.2	69.3	100	4.6	19.4	3.1	18.3
2017-04-27	14.2	1.6	2.7	1.8	12.4	6.7	41.4	97.7	3.7	19.1	3.5	18.7
2017-04-28	16.5	1.2	0	1.5	14.1	7.4	39.4	100	4.8	18.8	3.9	20
2017-04-29	17.9	0.2	0	1.7	15.6	9.6	46.8	100	3.5	18.5	3.1	16.2
2017-04-30	18.7	5.1	0	1.9	12.2	10.4	48.3	100	2.3	19.4	4.4	19.4
2017-05-01	20.1	4.9	0	2.2	11.9	11.3	48.1	100	3.9	18.7	2.6	17.4
2017-05-02	16.8	8.4	0	1.1	6.2	10.3	53.9	93.5	5.4	19.4	1.8	17.8
2017-05-03	14.2	2.9	0	1	12.1	6.9	42.6	91.7	1.2	20.9	3.9	19.5
2017-05-04	16.9	1.4	0	1.2	12.6	9.2	47.8	100	3.1	21.1	5.4	20.7
2017-05-05	18.6	1.9	0	1.6	13	10.5	49	100	2.9	20.7	4.8	20.5
2017-05-06	18.4	5.4	0	1.4	9	12.2	57.7	100	4.8	19.8	4.6	18.8
2017-05-07	14.8	5.9	0	2.1	15.6	6.4	38	69	4.4	18	1.9	18.3
2017-05-08	14.2	-2.6	0	1.1	11.2	6.8	42	100	4.5	18.7	2.1	19
2017-05-09	15.9	-1	0	1.4	13.7	8.1	44.9	100	2.6	17.1	3.3	15.9
2017-05-10	17.5	-1.2	0	1.5	13.8	8.7	43.5	100	3.1	18.2	2.9	16.3
2017-05-11	17.4	-0.1	0	1.3	12.6	8.4	42.3	100	1.9	20.1	3	20.9
2017-05-12	15.7	2	0	1	8.9	9	50.5	100	4.5	19.9	1.2	17.9
2017-05-13	18.4	4.8	0	1.1	8.9	11.2	52.9	100	3.7	18.1	1.9	16.6
2017-05-14	16.2	8.3	0	1	6.8	12.6	68.5	100	3.6	18.9	1.6	18.4
2017-05-15	15.9	6.5	1.8	1.6	9.1	11.6	64.2	100	2.8	18.8	3.6	16.8
2017-05-16	16.2	1.8	0	1.2	12.3	9.1	49.4	100	2.9	17.4	2.8	16.7
2017-05-17	17	-0.9	0	1.2	10.8	7.7	39.8	100	2.9	20.3	3.2	19.9
2017-05-18	17.9	3.4	0	1.1	12.8	12.4	60.5	100	4.3	17.7	4.3	17
2017-05-19	15.5	9.7	0	1.3	4.8	13	73.9	100	3.5	18.7	4.6	18.1
2017-05-20	17.9	10.2	18.7	1.3	10.5	12.6	61.5	100	4.5	17	2.3	16.4
2017-05-21	17.7	1.9	0	1.1	10.9	9.9	48.9	100	3.3	21.9	3.1	20.9
2017-05-22	17	2.9	0	0.9	11.5	10.6	54.7	100	3.9	19.2	3.3	18.7
2017-05-23	18.3	6	0	1.4	11	11.6	55.2	100	3.9	19.6	4.8	18.1
2017-05-24	16.2	7.5	9.4	1.6	9.4	12.6	68.5	100	3.9	18.5	1.3	16.9
2017-05-25	14.5	0.8	0	1	12.8	8.3	50.3	100	2.7	19.9	2.8	18.1
2017-05-26	16.6	1	0	1	11.3	8.9	47.1	100	3.5	20.5	2.7	18.4
2017-05-27	16.5	3.5	0	1	9.2	10.7	57	100	1.8	19.3	4.5	18.6
2017-05-28	15.6	4.9	0	1.6	9	10.5	59.3	100	4.3	21.5	2.9	20.3
2017-05-29	11.7	3.5	0	1.5	12	6.4	46.6	81.6	4.6	19.6	3.7	18.3
2017-05-30	12.9	-1.8	0	1.3	10.3	7.1	47.7	100	3.2	20.9	2.3	21.1
2017-05-31	10.8	2.7	0	1.2	10.4	5.8	44.8	78.2	3.8	20.4	3.5	19.8
2017-06-01	13.1	-2.9	0	0.9	11.3	6.4	42.5	100	3.6	18.1	3.5	18.8
2017-06-02	13.5	-3	0	0.8	10.1	6.9	44.6	100	3	18.5	3.5	17.5
2017-06-03	13.9	-1	0	0.7	7.8	7.4	46.6	100
2017-06-04	14.1	-0.5	0	0.8	11	8	49.8	100
2017-06-05	13.5	-0.7	0	0.8	9.5	6.7	43.3	100
2017-06-06	11.6	-0.2	0	1.3	4.3	7.6	55.7	100
2017-06-07	10.5	5.2	5.6	0.7	4.2	9.2	72.5	100
2017-06-08	14.5	7.2	8.2	0.7	9	11.8	71.5	100
2017-06-09	11.7	4.7	0.2	0.9	4.2	10.9	79.3	100
2017-06-10	12.7	7.9	0	0.6	5.7	11.1	75.6	100
2017-06-11	16	3.3	0	0.8	10.2	10	55	100
2017-06-12	15.3	-0.2	0	0.7	9.5	8.6	49.5	100
2017-06-13	14.6	-0.6	0	1	9.2	7.9	47.6	100
2017-06-14	15.8	0.3	0	0.8	9.3	8.5	47.4	100
2017-06-15	13.7	-2.2	0	0.4	6.3	8.8	56.2	100
2017-06-16	11.7	0.5	0	0.5	3.2	8.7	63.3	100
2017-06-17	13.8	4.7	0	0.5	3.7	10.8	68.5	100
2017-06-18	13.1	3.5	0	0.9	10.2	9.2	61.1	100
2017-06-19	15.3	-1.5	0	1.3	9.5	7.4	42.6	100
2017-06-20	14.9	1.6	0	0.9	10.9	9.1	53.7	100
2017-06-21	14	-2.6	0	0.7	10	6.4	40.1	100
2017-06-22	13.7	0.3	0	1	8.7	8.2	52.3	100
2017-06-23	14.1	-1.2	0	1.3	7.9	7.7	47.9	100
2017-06-24	14	2.5	0	1.4	10.1	7.9	49.5	100
2017-06-25	12.9	-3.1	0	1.1	11.4	6.2	41.7	100
2017-06-26	13.4	-0.5	0	1.1	11.7	7.6	49.5	100
2017-06-27	11.2	-2.6	0	0.5	6.8	6.9	51.9	100
2017-06-28	11.6	1.6	0	0.6	4.3	8.6	63	100
2017-06-29	12.6	-3.6	0	0.8	8.3	6.2	42.5	100
2017-06-30	10.3	-2.2	0	1	11.8	5.9	47.1	100
2017-07-01	11.2	-5.4	0	1	11.8	5	37.6	100
2017-07-02	14.1	-5.7	0	0.8	11	5	31.1	100
2017-07-03	12	-5.4	0	0.5	4.2	6	42.8	100
2017-07-04	14.8	1.8	0	1.4	9.1	6.8	40.4	97.8
2017-07-05	13.3	5.9	0	1.3	7.7	8.9	58.3	95.9
2017-07-06	12.4	-0.1	0.1	1.4	11.4	8.2	57	100
2017-07-07	12.3	-2.4	0	1.4	7.3	7.1	49.7	100
2017-07-08	11.4	-1.8	0.1	0.4	10.8	7.1	52.7	100
2017-07-09	11.7	2.1	0	1.5	9	6.9	50.2	97.1
2017-07-10	11.7	-1.6	0	1	9.5	6.7	48.8	100
2017-07-11	13.1	-4.3	0	0.7	10.6	6.2	41.2	100
2017-07-12	11.6	-4.7	0	0.8	9.1	6.1	44.7	100
2017-07-13	13.6	-3.8	0	0.9	8.9	5.9	37.9	100
2017-07-14	15.4	-0.4	0	1.8	9.1	7.8	44.6	100
2017-07-15	11.7	1.4	0	0.9	6.7	8	58.2	100
2017-07-16	11.5	-4.9	0	1	11.5	5.8	42.8	100
2017-07-17	14.3	-0.9	0	0.9	10.5	6.3	38.7	100
2017-07-18	15.1	0.9	0.1	1.8	11	8.4	49	100
2017-07-19	12.7	4	0	1.8	6.6	7.5	51.1	92.3
2017-07-20	10.6	2.2	0	1.4	8.8	6.7	52.5	93.6
2017-07-21	11.9	-2.2	0	1.3	12.2	5.9	42.4	100
2017-07-22	13.4	-5	0	1.4	12.9	6.1	39.7	100
2017-07-23	16.2	1.1	0	1.7	12.9	5.3	28.8	80.1
2017-07-24	14.1	1.4	0	1.7	12.3	8.2	51	100
2017-07-25	15.8	-0.8	0	2.1	12.9	8.3	46.3	100
2017-07-26	14.4	6.7	0	2	11.5	8.4	51.2	85.6
2017-07-27	13.2	-2.6	0	1.8	11	6.3	41.5	100
2017-07-28	14.1	1	6.3	1.7	11.3	8.2	51	100
2017-07-29	17.2	-2.3	0	2.3	14.2	7.1	36.2	100
2017-07-30	19.4	4.3	0	1.8	11.1	5.5	24.4	66.3
2017-07-31	9.1	7.6	9.4	1.5	5.8	10.7	92.6	100
2017-08-01	12.9	0.8	11.1	1.5	13	7.4	49.8	100
2017-08-02	12.6	-2.7	0	1.4	13.6	6.4	43.9	100
2017-08-03	11.5	-1.5	0	0.7	5.2	7.7	56.8	100
2017-08-04	10.5	3.6	11.7	1.6	7.2	8.3	65.4	100
2017-08-05	11.2	5.2	1.5	1.5	10.8	6.9	51.9	78
2017-08-06	14	4.7	0	2.3	13.4	7	43.8	82
2017-08-07	10	3.9	0.4	2.1	8.3	7.2	58.7	89.2
2017-08-08	12.4	1.5	0.1	1.6	14.8	6.5	45.2	95.5
2017-08-09	15.5	2	0	1.9	14.7	7.9	44.9	100
2017-08-10	17.4	2.8	0	4	9.3	8.2	41.3	100
2017-08-11	16	10	0	2.4	13.9	6.7	36.9	54.6
2017-08-12	15.8	5	0	2.2	12.7	6.6	36.8	75.7
2017-08-13	15.9	1.6	0	1.9	14.8	8.9	49.3	100
2017-08-14	18.6	1.1	0	2.3	16.4	8	37.3	100
2017-08-15	19.3	4.3	0.1	2.5	7	8.3	37.1	100
2017-08-16	14.2	8.3	4.5	2.2	12.6	10.3	63.6	94.1
2017-08-17	14.7	7.6	0.1	2.7	14	7.5	44.9	71.9
2017-08-18	10.7	4.4	0.1	2.9	7.9	6.5	50.6	77.8
2017-08-19	10.8	-0.5	0	2.4	13.8	5.1	39.4	86.6
2017-08-20	12.9	-3.1	0	1.9	16.2	5.2	35	100
2017-08-21	12.1	1.8	0	0.7	5.4	7.8	55.3	100
2017-08-22	15.9	-2.3	0	1.8	17.9	7.1	39.3	100
2017-08-23	16.4	-1	0	2.1	16.8	7.7	41.3	100
2017-08-24	11.9	-1.3	0	0.9	13	7.8	56	100
2017-08-25	13.8	-2.9	0	1.9	16.8	6.8	43.1	100
2017-08-26	16	-2.1	0	2.2	17.7	7.6	41.8	100
2017-08-27	10.7	0.8	0	0.8	7.5	6.1	47.4	94.3
2017-08-28	11.2	-0.9	1.9	1.8	16.9	5.7	42.9	99.7
2017-08-29	13	-3.5	0	2.1	16.3	7.1	47.4	100
2017-08-30	14.9	-4.2	0	2.5	17.6	6.5	38.4	100
2017-08-31	12.7	-1.9	0	2.1	17.5	5.6	38.2	100
2017-09-01	15	-2.8	0	2	18.3	6.6	38.7	100
2017-09-02	18.8	-2.9	0	3	17.5	7.6	35	100
2017-09-03	25.1	4.2	0	3.9	11	6.7	21	81.3
2017-09-04	13.9	6.7	0	3.5	17.8	6.3	39.7	64.2
2017-09-05	10.6	3.6	0.1	2.8	7.7	6	47	75.9
2017-09-06	11.8	3.9	0	2.4	15.2	5.8	41.9	71.9
2017-09-07	13.9	4.6	0	3	16.8	7.4	46.6	87.3
2017-09-08	14.2	4	0	2.6	14.3	7.4	45.7	91
2017-09-09	15.3	0.4	0	3.1	18.5	6.1	35.1	97
2017-09-10	17	-3.4	0	2.7	19.6	7.5	38.7	100
2017-09-11	19.3	0.1	0	3.2	17.2	8	35.8	100
2017-09-12	24.2	6.8	0	4.8	16.4	6.9	22.9	69.9
2017-09-13	22.9	12.2	0	5.4	18.2	5.3	19	37.3
2017-09-14	12.7	4.3	0.1	3.1	18.5	5.5	37.5	66.3
2017-09-15	14.9	5.3	0	3.7	10.8	7.9	46.7	88.7
2017-09-16	15.6	8	0	1.9	15.3	8.8	49.7	82.1
2017-09-17	16.4	-3.8	0	3	21.9	5.6	30	100
2017-09-18	21.8	-0.9	0	3.8	21.4	6.3	24.1	100
2017-09-19	15.6	6.9	0	4	20.3	6.5	36.7	65.4
2017-09-20	18.7	-2.4	0	2.8	21.8	6.6	30.6	100
2017-09-21	23.6	0.6	0	4	19.8	7.8	26.8	100
2017-09-22	25.6	7.7	0	4	15.3	5.7	17.4	54.3
2017-09-23	31.6	6.5	0	7.9	17.2	6.7	14.4	69.3
2017-09-24	20.6	13.3	0	6.6	18.1	7.7	31.7	50.4
2017-09-25	18.2	9.6	0	4.3	20.3	7.6	36.4	63.6
2017-09-26	19	2.5	0	4.1	23.5	6.5	29.6	88.9
2017-09-27	25.5	4.9	0	3.7	16.4	10.1	31	100
2017-09-28	20.6	11.1	8.8	4.7	20	11.6	47.8	87.8
2017-09-29	19.8	6	0	5	23.2	7.6	32.9	81.3
2017-09-30	18.3	8.9	0	4.2	19.8	5.7	27.1	50
2017-10-01	20.2	0.6	0	3.9	24.6	7.1	30	100
2017-10-02	22.4	2.7	0	3.6	21.9	11	40.6	100
2017-10-03	24.5	5.4	0	4	20.7	11.9	38.7	100
2017-10-04	23.9	5.8	0	3.9	20.4	12.6	42.5	100
2017-10-05	25.8	8.5	0	4	15	13.4	40.3	100
2017-10-06	20.9	11.1	0	4.3	18	10.9	44.1	82.5
2017-10-07	18.3	1.6	0	3.4	20.1	8.1	38.5	100
2017-10-08	22	2.9	0	1.1	18.2	11	41.6	100
2017-10-09	25.3	10.6	5.2	3.8	18.7	15.4	47.8	100
2017-10-10	23	9.4	0	3.7	17.6	11.6	41.3	98.4
2017-10-11	25.4	11.8	0	5.4	20.1	14.9	45.9	100
2017-10-12	20.4	13.3	0.2	5.2	23.4	10.6	44.2	69.4
2017-10-13	21.4	3.7	0	4.2	24.4	8.4	33	100
2017-10-14	14.3	9.9	0	2	12.9	10.9	66.9	89.4
2017-10-15	22.8	3.6	0	3.4	22.1	11.5	41.4	100
2017-10-16	23.6	5.9	0	4.4	24.1	13.1	45	100
2017-10-17	25.2	2.8	0	5.2	26.4	12.2	38.1	100
2017-10-18	25.5	6.7	0	4.6	25	12.8	39.2	100
2017-10-19	27.8	10.3	0	5	21.4	14.4	38.5	100
2017-10-20	13.3	12.2	9.4	2.2	10.6	13.6	89.1	95.8
2017-10-21	18.5	3.1	0.9	3.9	25	7.6	35.7	99.6
2017-10-22	18.8	8.5	0	3.4	9.4	10.2	47	92
2017-10-23	21.3	3.3	0.3	4	26.4	10.8	42.7	100
2017-10-24	24	5.1	0	4.2	22.4	11	36.9	100
2017-10-25	25.9	11.5	0	4.3	18.6	12.6	37.7	92.9
2017-10-26	19.1	11.9	0	3.6	10.8	13.3	60.2	95.5
2017-10-27	19.6	11.6	15.5	2.2	16	13.7	60.1	100
2017-10-28	26.3	11.7	0	3.3	19.7	14.7	43	100
2017-10-29	26	12	0	5	24.1	13.2	39.3	94.2
2017-10-30	24.9	13.5	0	6.2	20.9	10.8	34.3	69.8
2017-10-31	17.5	4.8	0.9	4	22.5	7.1	35.5	82.6
2017-11-01	20.5	3.2	0	4.2	19.7	6.9	28.6	89.8
2017-11-02	21.6	6.3	0	4.1	24.4	8.6	33.3	90.1
2017-11-03	21.4	7.9	0	4.1	19.1	10.8	42.4	100
2017-11-04	16.7	9.1	0	3.6	8.7	9.7	51.1	84
2017-11-05	15.2	7.8	0	3.3	13	10	57.9	94.6
2017-11-06	14.3	9.9	26.6	4.9	10.6	13	79.8	100
2017-11-07	18.3	3.9	14.9	4.4	27.8	7.7	36.6	95.4
2017-11-08	18.7	4.5	0	4	25.8	7	32.5	83.1
2017-11-09	22.5	2.2	0	5	30.4	10.9	40	100
2017-11-10	23.1	4.5	0	4.1	27.3	10.7	37.9	100
2017-11-11	22.5	9.4	0	4.4	23.2	12.2	44.8	100
2017-11-12	21.3	9.4	0.5	4.2	21.1	12.6	49.8	100
2017-11-13	20.7	8.8	0	4.2	24.3	10.8	44.3	95.4
2017-11-14	23.3	5.6	0	5	28.1	10.1	35.3	100
2017-11-15	27	6.7	0	5.4	28.9	12.2	34.2	100
2017-11-16	23.5	10.6	0	2.3	17.2	13.7	47.3	100
2017-11-17	21.9	14.3	1.9	1.7	15.9	15.8	60.2	97
2017-11-18	19.5	13.5	0	2	9.2	15.3	67.5	98.9
2017-11-19	20.5	8.9	3.1	3.6	23.4	12	49.8	100
2017-11-20	22.4	8.8	0	4.7	24.3	12.3	45.4	100
2017-11-21	22.4	9.6	0	5.1	26.3	11.6	42.8	97.1
2017-11-22	24	7.4	0	5	22.4	12.8	42.9	100
2017-11-23	26	9.3	0	3.4	25.2	13.3	39.6	100
2017-11-24	27.9	8.7	4	5	23.2	14.6	38.9	100
2017-11-25	28.4	9.7	0	4.9	26.8	15.3	39.6	100
2017-11-26	28.1	9.9	0	4	21.7	15.7	41.3	100
2017-11-27	24.2	15.6	23.5	2.9	19.2	18.6	61.6	100
2017-11-28	24.8	13.3	0.4	4.4	22.6	17.3	55.3	100
2017-11-29	26.2	13.8	0	5	22.3	17.1	50.3	100
2017-11-30	28.1	11.1	0	6.2	25.3	17.1	45	100
2017-12-01	30.2	14.4	0	6.2	22.9	18.4	42.9	100
2017-12-02	20.6	17.8	22.4	1.8	11.1	19.8	81.6	97.2
2017-12-03	19.7	12.7	14.8	3.9	17.8	13.5	58.8	92
2017-12-04	13.4	9.8	0	2	12.6	11.1	72.2	91.7
2017-12-05	16.2	10.8	10	2.5	9.7	13.6	73.9	100
2017-12-06	20.3	11.8	1.5	3.6	9.4	13.2	55.4	95.4
2017-12-07	26.1	10.9	0	6.2	30.4	12.7	37.6	97.5
